# Supplementary material for: Childhood type 1 diabetes: an environment-wide association study across England
Source: PubMed Central journal article supplement (PMC7145790; doi:10.1007/s00125-020-05087-7), 2020-01-24
Supplement: 125_2020_5087_MOESM1_ESM.pdf [file 125_2020_5087_MOESM1_ESM.pdf]

**Childhood Type 1 Diabetes; an Environment Wide Association Study across England – Electronic  
Supplementary material**

Annalisa Sheehan<sup>1,2</sup>, Anna Freni Sterrantino<sup>1,3</sup>, Daniela Fecht<sup>1,3</sup>, Paul Elliott<sup>1,3,4</sup>, Susan  
Hodgson<sup>1,3</sup>

1 MRC Centre for Environment and Health, Department of Epidemiology and Biostatistics, Imperial  
College London, London, UK

2 School of Population Health & Environmental Sciences, Faculty of Life Sciences & Medicine, King's  
College London, UK

3 UK Small Area Health Statistics Unit, School of Public Health, Imperial College London, London, UK

4 Imperial College NIHR Biomedical Research Centre, Imperial College London, London, UK

ESM Table 1: Summary of the environmental variables assessed in the ecological Environment Wide Association Study

| Variable                                                                                              | Data source                           | Time period          | Resolution        | LAD-measure           | 25/50/75 percentile | Units                 |
|-------------------------------------------------------------------------------------------------------|---------------------------------------|----------------------|-------------------|-----------------------|---------------------|-----------------------|
| <b>Meteorological conditions</b>                                                                      |                                       |                      |                   |                       |                     |                       |
| Sunshine duration (minimum)                                                                           | British Atmospheric Data Centre/SAHSU | 1980-2005            | 1×1km             | Population weighted   | 3.45/3.74/ 3.90     | Hours                 |
| Sunshine duration (maximum)                                                                           | British Atmospheric Data Centre/SAHSU | 1980-2005            | 1×1km             | Population weighted   | 3.74/3.89/4.07      | Hours                 |
| Minimum temperature                                                                                   | Met Office UKCP09                     | 1981-2010            | 5km grid          | Population weighted   | 0.51/0.97/1.43      | °C                    |
| Maximum temperature                                                                                   | Met Office UKCP09                     | 1981-2010            | 5km grid          | Population weighted   | 20.12/21.05/21.97   | °C                    |
| Ultraviolet Radiation                                                                                 | Cherrie et al. 2015 <sup>1</sup>      | July 2002- June 2003 | postcode district | Area weighted         | 1857/2008/2102      | J/m <sup>2</sup> /day |
| <b>Built Environment</b>                                                                              |                                       |                      |                   |                       |                     |                       |
| Green space                                                                                           | CEH Land Cover Map 2000               | 2000                 | 25m×25m           | Percent of total area | 16.68/21.68/29.42   | %                     |
| Blue space                                                                                            | CEH Land Cover Map 2000               | 2000                 | 25m×25m           | Percent of total area | 0.29/0.72/2.55      | %                     |
| Built environment                                                                                     | CEH Land Cover Map 2000               | 2000                 | 25m×25m           | Percent of total area | 7.22/15.98/39.34    | %                     |
| Intense agriculture                                                                                   | CEH Land Cover Map 2000               | 2000                 | 25m×25m           | Percent of total area | 23.01/48.72/65.81   | %                     |
| ANGSt criteria 1 - at least 2 hectares greenspace, no more than 300 metres (5 minutes walk) from home | OS Greenspace data                    | 2017                 | -                 | Percent of population | 31.70/39.98/49.71   | %                     |

<sup>1</sup> Cherrie MP, Wheeler BW, White PM, Sarran CE and Osborne NJ (2015). Coastal climate is associated with elevated solar irradiance and higher 25(OH)D level. Environment International 77:76-84

|                                                                                          |                                    |      |         |                       |                   |                                               |
|------------------------------------------------------------------------------------------|------------------------------------|------|---------|-----------------------|-------------------|-----------------------------------------------|
| ANGSt criteria 2 - at least one accessible 20 hectare site within two kilometres of home | OS Greenspace data                 | 2017 | -       | Percent of population | 46.39/68.01/87.21 | %                                             |
| ANGSt criteria 3 - one accessible 100 hectare site within five kilometres of home        | OS Greenspace data                 | 2017 | -       | Percent of population | 3.66/29.49/73.35  | %                                             |
| ANGSt criteria 4 - one accessible 500 hectare site within ten kilometres of home         | OS Greenspace data                 | 2017 | -       | Percent of population | 0.00/0.00/0.00    | %                                             |
| Rural status                                                                             | Defra's Rural Urban Classification | 2001 | -       | Percent of population | 1.50/28.88/66.70  | %                                             |
| Urban status                                                                             | Defra's Rural Urban Classification | 2001 | -       | Percent of population | 33.29/71.12/98.50 | %                                             |
| <b>Environmental Pollutants</b>                                                          |                                    |      |         |                       |                   |                                               |
| Aggregate radon potential class                                                          | PHE/BGS Radon Potential Dataset    | 2007 | 1km×1km | Population weighted   | 1/1/2             | Radon Potential Class                         |
| PM <sub>2.5</sub>                                                                        | Defra                              | 2002 | 1km×1km | Population weighted   | 9.00/9.63/10.33   | µg m <sup>-3</sup>                            |
| PM <sub>10</sub>                                                                         | Defra                              | 2001 | 1km×1km | Population weighted   | 14.43/15.39/16.75 | µg m <sup>-3</sup>                            |
| NO <sub>2</sub>                                                                          | Defra                              | 2001 | 1km×1km | Population weighted   | 19.44/26.12/31.79 | µg m <sup>-3</sup>                            |
| NO <sub>x</sub>                                                                          | Defra                              | 2001 | 1km×1km | Population weighted   | 28.71/44.12/58.66 | µg m <sup>-3</sup>                            |
| CO                                                                                       | Defra                              | 2002 | 1km×km  | Population weighted   | 0.20/0.24/0.28    | mg m <sup>-3</sup>                            |
| SO <sub>2</sub>                                                                          | Defra                              | 2002 | 1km×km  | Population weighted   | 2.44/3.40/4.88    | µg m <sup>-3</sup>                            |
| Ozone                                                                                    | Defra                              | 2003 | 1km×1km | Population weighted   | 12.27/15.66/19.79 | # days daily max 8-hr >120 µg m <sup>-3</sup> |
| Benzene                                                                                  | Defra                              | 2003 | 1km×1km | Population weighted   | 0.00/0.00/0.00    | µg m <sup>-3</sup>                            |

|                                   |                                                  |           |                       |                     |                   |                    |
|-----------------------------------|--------------------------------------------------|-----------|-----------------------|---------------------|-------------------|--------------------|
| PM <sub>10</sub>                  | EU-wide LUR (Vienneau et al. 2013 <sup>2</sup> ) | 2007      | 100m resolution       | Population weighted | 20.65/21.83/23.24 | µg m <sup>-3</sup> |
| NO <sub>2</sub>                   | EU-wide LUR (Vienneau et al. 2013 <sup>2</sup> ) | 2007      | 100m resolution       | Population weighted | 20.71/24.83/29.95 | µg m <sup>-3</sup> |
| Lead (Pb) in soil                 | BGS                                              | 1978-2014 | Various (500m to 5km) | Population weighted | 43.92/66.79/104   | mg/kg              |
| Cadmium (Cd) in soil              | BGS                                              | 1978-2014 | Various (500m to 5km) | Population weighted | 0.21/0.32/0.49    | mg/kg              |
| Arsenic (As) in soil              | BGS                                              | 1978-2014 | Various (500m to 5km) | Population weighted | 10.65/13.85/17.94 | mg/kg              |
| Nitrates in drinking water        | 14 Water companies <sup>3</sup>                  | 2000-2010 | Various               | Population weighted | 5.36/19.03/26.81  | mg/l               |
| Fungicides                        | INTRARESE project/Defra/FERA                     | June 2000 | Ward 1998             | Population weighted | 0.60/46.05/439    | Kg <sup>2</sup>    |
| Herbicides and desiccants         | INTRARESE project/Defra/FERA                     | June 2000 | Ward 1998             | Population weighted | 3.17/72.55/485    | Kg <sup>2</sup>    |
| Growth regulators                 | INTRARESE project/Defra/FERA                     | June 2000 | Ward 1998             | Population weighted | 0.00/36.72/263    | Kg <sup>2</sup>    |
| Insecticides/nemacides/acaracides | INTRARESE project/Defra/FERA                     | June 2000 | Ward 1998             | Population weighted | 0.27/5.70/34.37   | Kg <sup>2</sup>    |
| Molluscicides and repellents      | INTRARESE project/Defra/FERA                     | June 2000 | Ward 1998             | Population weighted | 0.00/3.27/32.02   | Kg <sup>2</sup>    |
| Other pesticides                  | INTRARESE                                        | June      | Ward 1998             | Population          | 0.10/61.09/329    | Kg <sup>2</sup>    |

<sup>2</sup> Vienneau D, de Hoogh K, Bechle MJ, Beelen R, van Donkelaar A, Martin RV, Millet DB, Hoek G and Marshall JD (2013). Western European land use regression incorporating satellite- and ground-based measurements of NO<sub>2</sub> and PM<sub>10</sub>. Environ Sci Technol 47(23): 13555-13564

<sup>3</sup> Anglian water, Bristol Water, South Staffs Water, Northumbrian Water, Portsmouth Water, Severn Trent Water, SES Water, Southern Water, South East Water, South West Water, Thames Water, United Utilities, Dŵr Cymru Welsh Water and Wessex Water

|                                                       |                                                   |           |                              |                                  |                   |                             |
|-------------------------------------------------------|---------------------------------------------------|-----------|------------------------------|----------------------------------|-------------------|-----------------------------|
|                                                       | project/Defra/FERA                                | 2000      |                              | weighted                         |                   |                             |
| Total pesticides                                      | INTRARESE project/Defra/FERA                      | June 2000 | Ward 1998                    | Population weighted              | 8.42/265/1622     | Kg <sup>2</sup>             |
| Light at Night                                        | MANTLE project (Briggs et al. 2007 <sup>4</sup> ) | 2002      | 200m raster grid             | Population weighted              | 3.98/9.51/19.26   | Deciles of arbitrary units  |
| <b>Demographic</b>                                    |                                                   |           |                              |                                  |                   |                             |
| Population density 2000                               | Office for National Statistics                    | 2000      | LADUA 2001                   | 1000 persons per km <sup>2</sup> | 0.17/0.50/1.84    | persons per km <sup>2</sup> |
| Population density 2001                               | Office for National Statistics                    | 2001      | LADUA 2001                   | 1000 persons per km <sup>2</sup> | 0.18/0.50/1.84    | persons per km <sup>2</sup> |
| Overcrowding                                          | Census 2001                                       | 2001      | -                            | Percent of population            | 0.82/1.07/1.48    | % ≥1 persons/room/household |
| Index of Multiple Deprivation (IMD)                   | Communities and Local Government                  | 2004      | Super Output Area (SOA) 2001 | Population weighted              | 12.20/16.89/23.82 | IMD Score                   |
| IMD living environment domain                         | Communities and Local Government                  | 2004      | SOA 2001                     | Population weighted              | 11.19/15.87/23.96 | IMD Score                   |
| IMD barriers to housing and services domain           | Communities and Local Government                  | 2004      | SOA 2001                     | Population weighted              | 18.14/22.97/27.32 | IMD Score                   |
| IMD education, skills and training deprivation domain | Communities and Local Government                  | 2004      | SOA 2001                     | Population weighted              | 12.59/17.82/24.73 | IMD Score                   |
| IMD employment deprivation domain                     | Communities and Local Government                  | 2004      | SOA 2001                     | Population weighted              | 0.06/0.08/0.12    | IMD Score                   |
| IMD income deprivation domain                         | Communities and Local Government                  | 2004      | SOA 2001                     | Population weighted              | 0.08/0.11/0.15    | IMD Score                   |
| IMD crime domain                                      | Communities and Local Government                  | 2004      | SOA 2001                     | Population weighted              | -0.64/-0.29/0.16  | IMD Score                   |
| IMD health deprivation and disability domain          | Communities and Local Government                  | 2004      | SOA 2001                     | Population weighted              | -0.68/-0.22/0.28  | IMD Score                   |

<sup>4</sup> Briggs DJ, Gulliver J, Fecht D and Vienneau DM (2007). Dasymeric modelling of small-area population distribution using land cover and light emissions data. Remote Sensing of Environment 108(4): 451-466

|                     |       |      |                               |                                       |                   |        |
|---------------------|-------|------|-------------------------------|---------------------------------------|-------------------|--------|
| Tobacco expenditure | CACI  | 2014 | COA 2011                      | Expenditure per adult (age ≥16 years) | 6.25/6.96/7.71    | £/week |
| White ethnicity     | SAHSU | 2001 | Census Output Area (COA) 2001 | Percent of population                 | 93.94/97.66/98.62 | %      |
| Black ethnicity     | SAHSU | 2001 | COA 2001                      | Percent of population                 | 0.15/0.27/0.88    | %      |
| Asian ethnicity     | SAHSU | 2001 | COA 2001                      | Percent of population                 | 0.29/0.67/2.78    | %      |

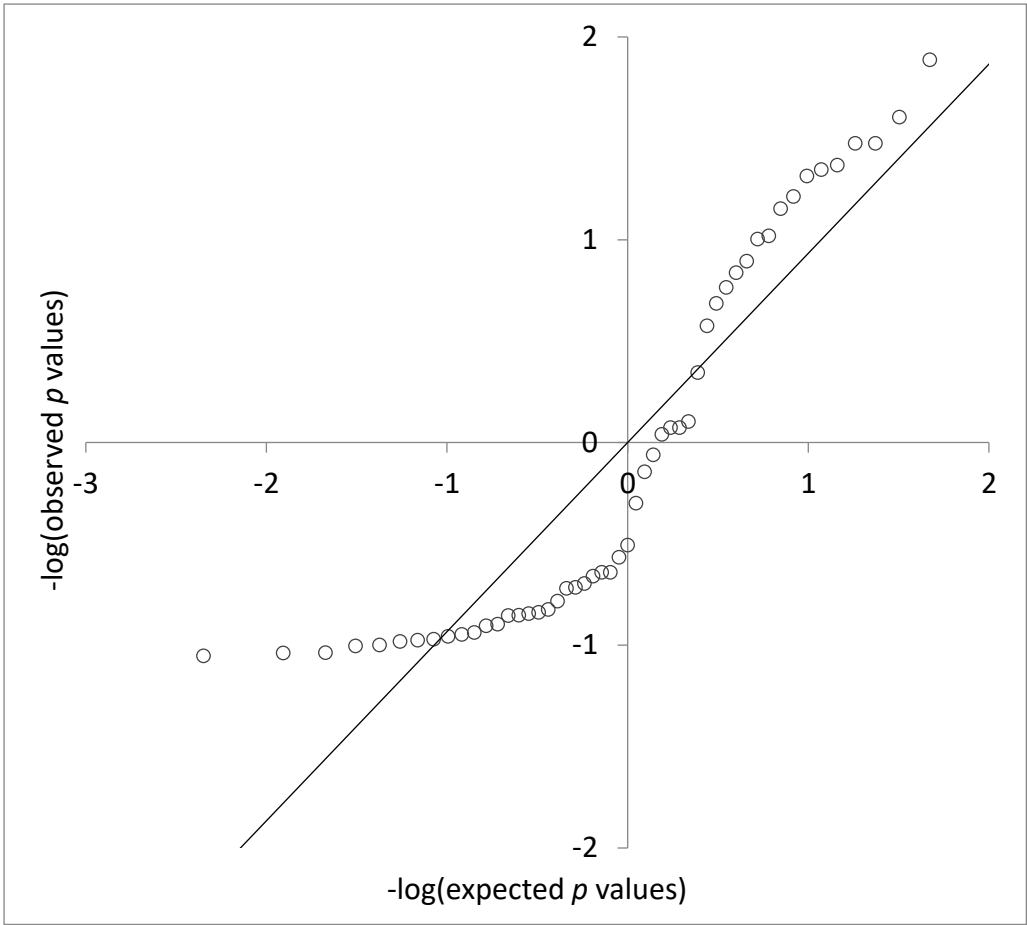

ESM Figure 1: Quantile-quantile (Q-Q) plot of the observed  $\log p$  values (y axis) versus the expected  $\log p$  values (y-axis) from the EnWAS. The diagonal (solid line) shows expectation under the null.
